# Supplementary material for: Anisomycin Activates Utrophin Upregulation Through a p38 Signaling Pathway
Source: PubMed Central journal article supplement — Clin Transl Sci. 2018 Jun 7;11(5):506–12. doi: 10.1111/cts.12562 (PMC6132359; doi:10.1111/cts.12562), 2018-06-07
Supplement: CTS-11-506-s001.pdf [file CTS-11-506-s001.pdf]

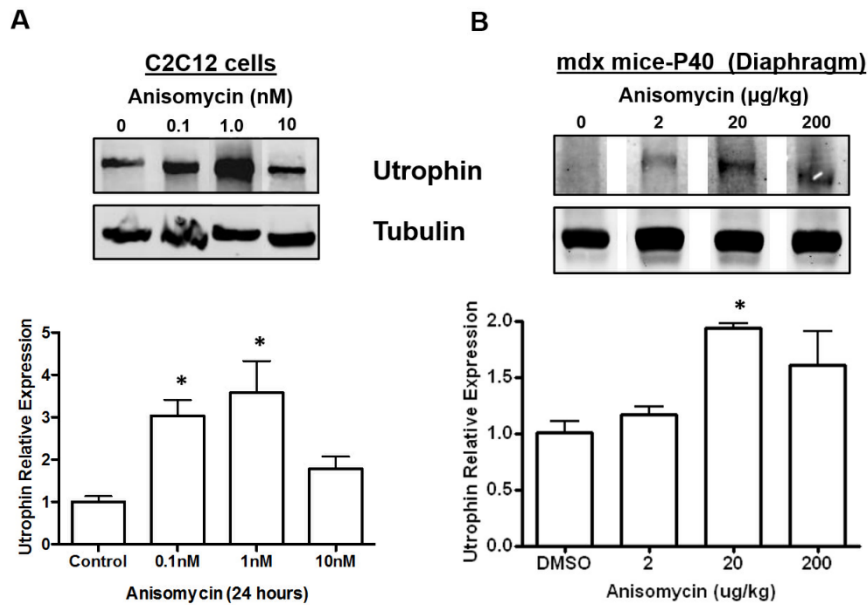

**Figure S1. Anisomycin *in vitro* and *in vivo* dose curves.** A) Utrophin protein levels in C2C12 myoblasts treated with DMSO, 0.1, 1, 10 nM Anisomycin (n=4). B) Utrophin protein levels in the diaphragms of male *mdx* mice that received daily intraperitoneal (i.p.) injections of vehicle (DMSO) or anisomycin (2, 20, 200 µg/kg) from P10 for 30 days (n=3). Odyssey CLX Imager was used to identify the protein of interest (western blot). The figure depicts preliminary results of utrophin induction by anisomycin at a range of doses. (\*p<0.05, two-tailed un-paired Student's t-test).
